# Supplementary material for: Novel BH4-BCL-2 Domain Antagonists Induce BCL-2-Mediated Apoptosis in Triple-Negative Breast Cancer
Source: MDPI journal article supplement (doi:10.3390/cancers14215241), 2022-10-26
Supplement: s1 [file s1]

# Novel BH4-BCL-2 domain antagonists induce BCL-2 mediated apoptosis in triple negative breast cancer

Vishnupriya Kanakaveti<sup>1</sup>, Sakthivel R<sup>1</sup>, Rahul Kanumuri<sup>2</sup>, Vaishnavi B<sup>2</sup>, Roshni Saravanan<sup>2</sup>, Inemai Ezhil<sup>1</sup>, Ravishankar Pitani<sup>3</sup>, Ganesh Venkatraman<sup>2\*</sup>, Suresh K Rayala<sup>1\*</sup>, and M. Michael Gromiha<sup>1\*</sup>

## Supplementary Figures

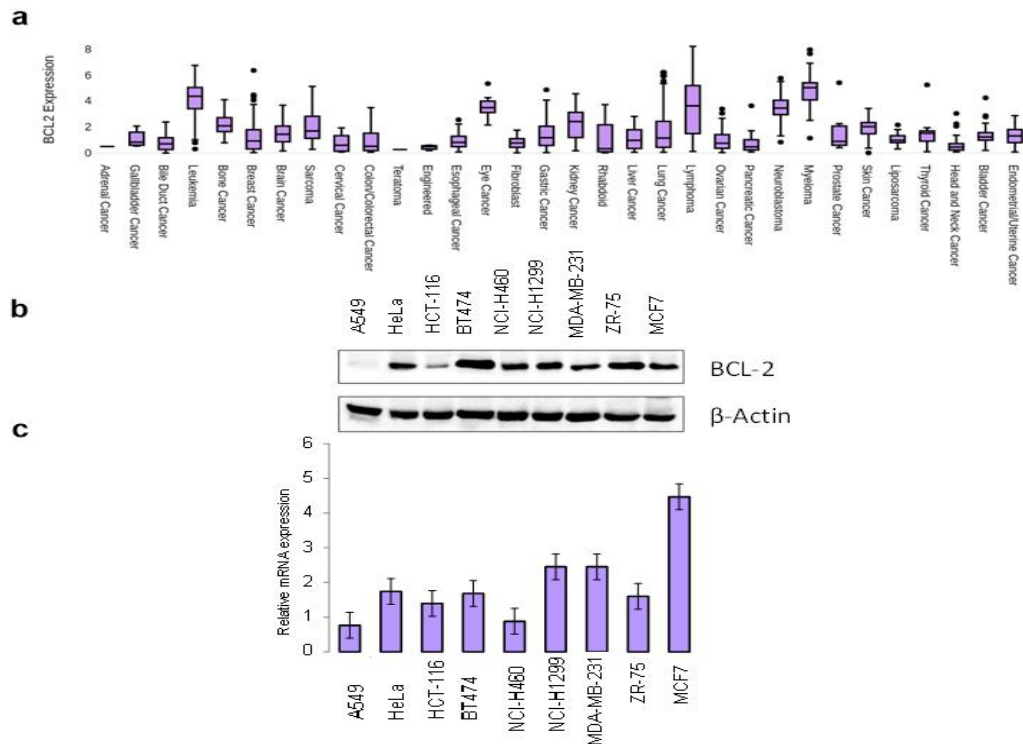

**Supplementary Figure S1: Quantitative profiling of BCL-2 gene and protein** a) mRNA expression data for 1303 cancer cell lines from CCLE (Cancer Cell line encyclopedia), b) and c) Proteins and mRNA expression of BCL-2 in different cancer cell lines.

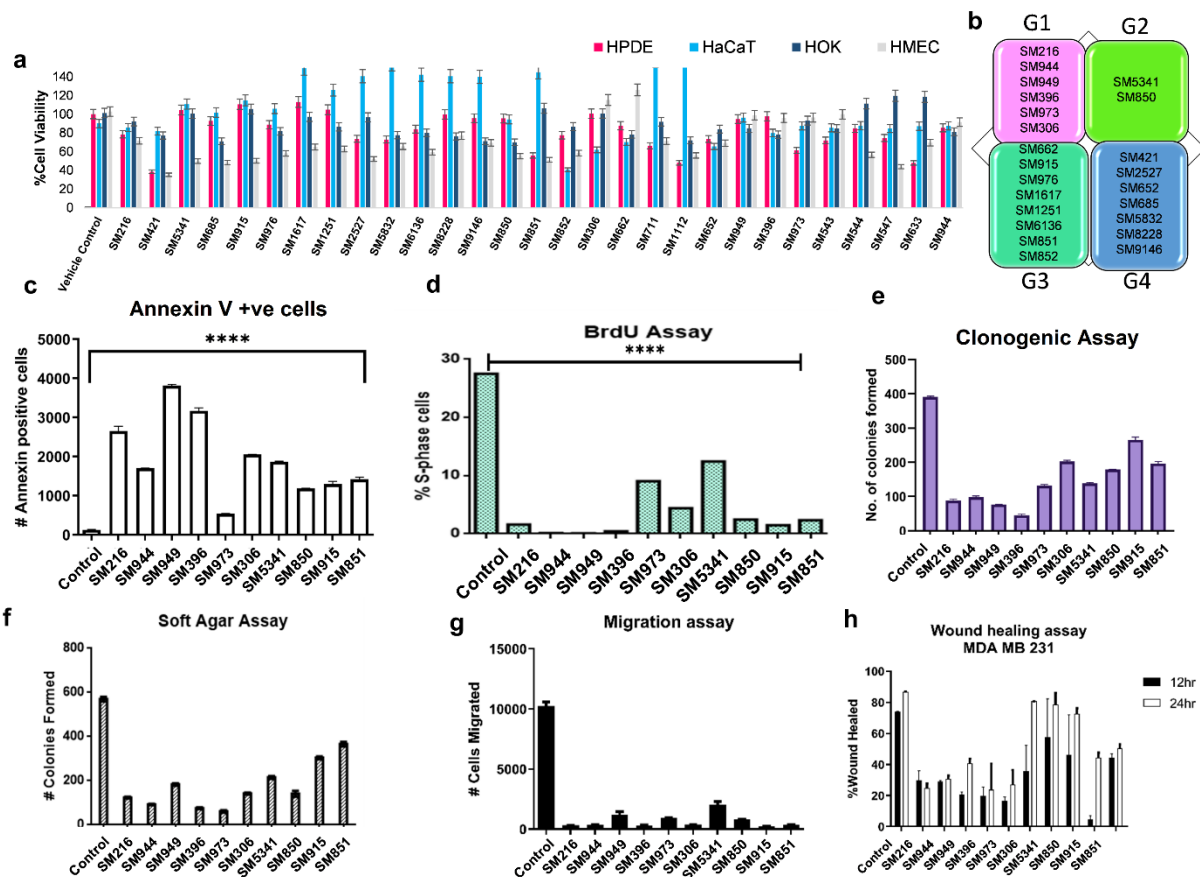

**Supplementary Figure S2: Screening 29 lead compounds and identification of top 10 lead compounds.** **a)** Cell viability of the 29 lead compounds by MTT assay on normal cells **b)** Classification of compounds based on the cytotoxicity on cancer and normal cells, where G1: highly active and non-toxic compounds, G2: Active and less toxic compounds, G3: Active and moderately toxic and G4: less active and toxic compounds. **c)** Annexin V apoptosis assay on MDA-MB-231 cells treated with the top 10 lead compounds. **d)** S-phase fraction of MDA-MB-231 cells by BrdU cell proliferation assay upon treatment with top 10 lead compounds **e)** Clonogenic assay on MDA-MB-231 cells upon treatment with top 10 lead compounds. **f)** Soft agar assay on MDA-MB-231 cells upon treatment with top 10 lead compounds. **g)** Trans-well migration assay on MDA-MB-231 cells upon treatment with top 10 lead compounds. **h)** Wound healing assay on MDA-MB-231 cells upon treatment with top 10 lead compounds.

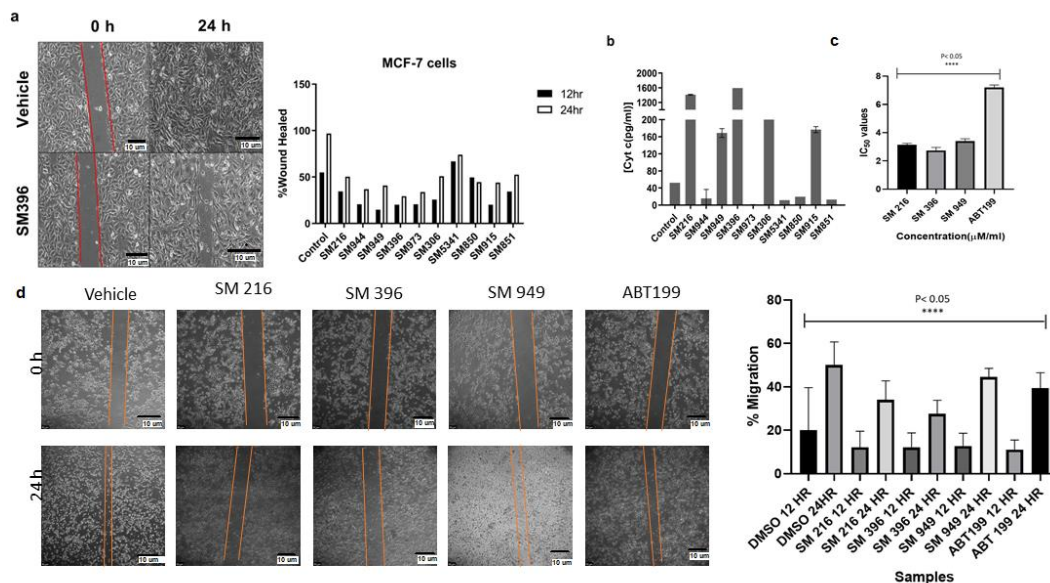

**Supplementary Figure S3: Anti-tumor activity of lead compounds on breast cancer cells. a)** Wound healing assay upon treatment with top 10 lead compounds on MCF7 breast cancer cells. **b)** Analysis of Cyt C release by ELISA on MCF 7 breast cancer cells. **c)** The IC<sub>50</sub> values derived from the dose-response curve fitting of the three lead compounds. The values are 3.14 μM, 2.7μM and 3.4 μM for SM216, SM396 and SM949, respectively treated on BT549 cells. ABT-199 was observed to exhibit an IC<sub>50</sub> of 7.19 μM **d)** Wound healing assay performed on BT549 cells and the bar graph depicts the % migration for 12 and 24 h treatments.

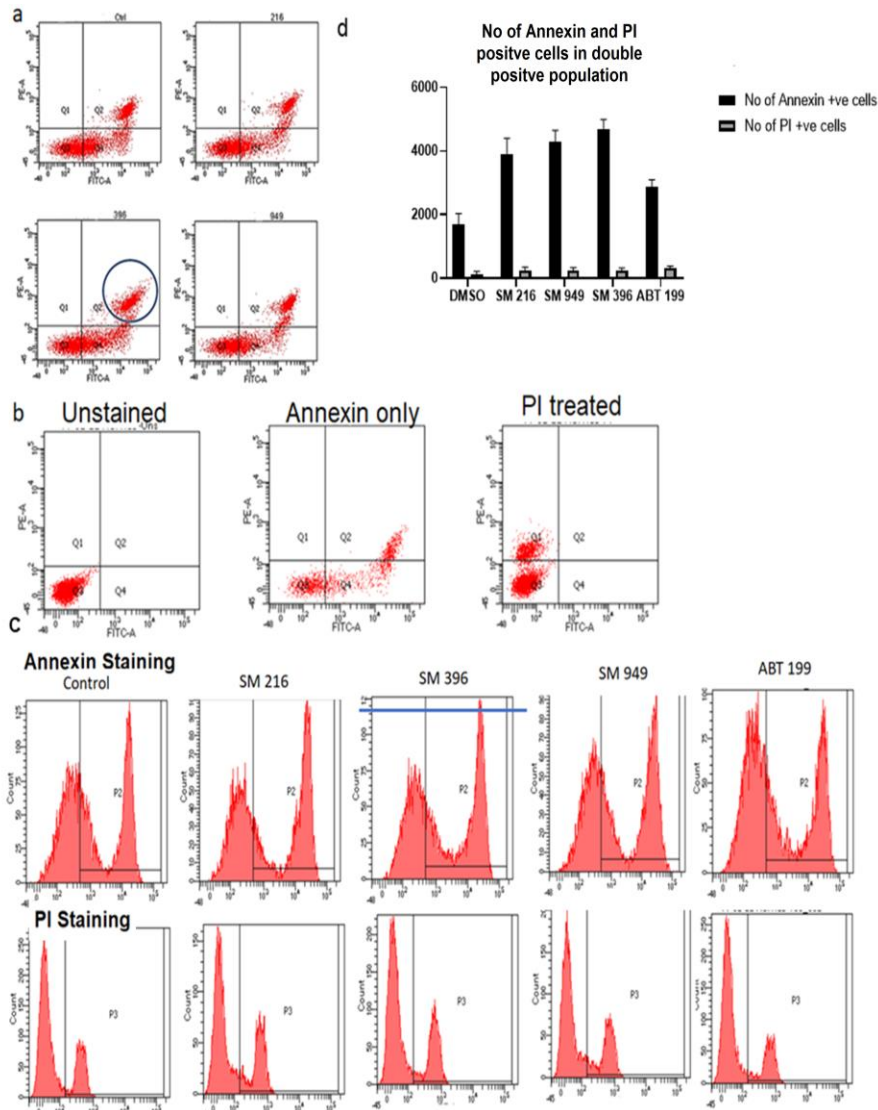

**Supplementary Figure S4:** **a)** Representative images for the Annexin V assay performed on BT549 cells **b)** Representative images showing the populations for unstained, Annexin V alone and PI stained cells. **c)** Histograms showing Annexin V & PI staining intensity in small molecule inhibitor treated population. SM396 shows increased level of Annexin V positive cells when compared to other treated samples (highlighted with a blue line) **d)** Number of cells stained with annexin V and PI in double positive cells of treated population.

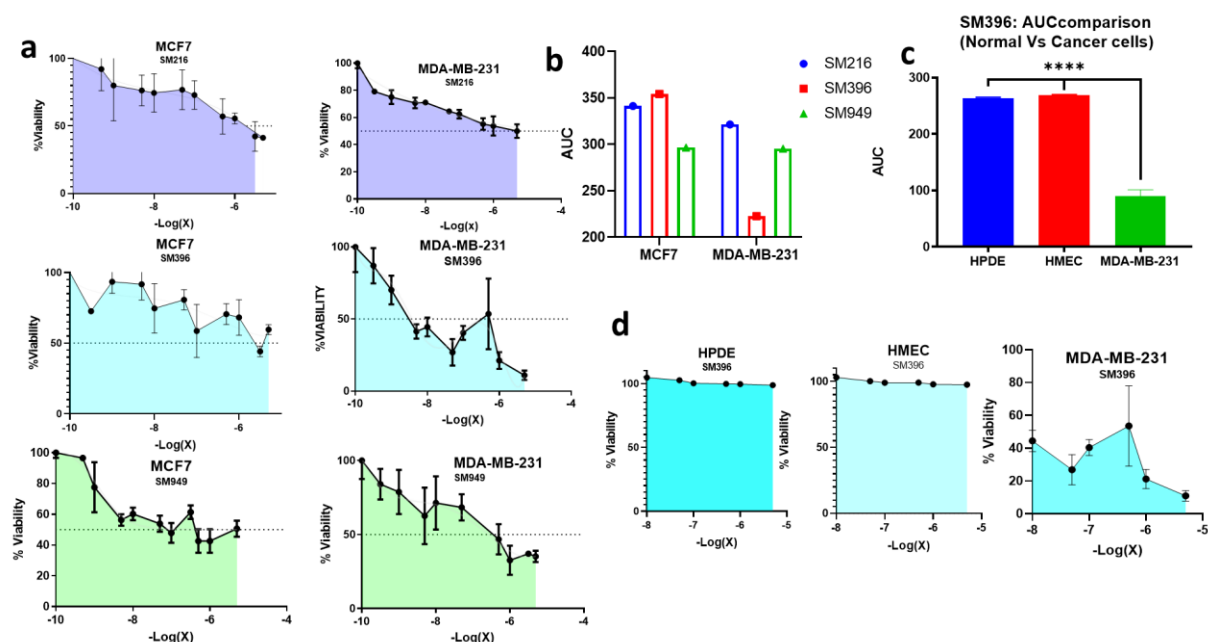

**Supplementary Figure S5:** a) AUC calculation of the top three compounds SM216, SM949 and SM396, respectively tested on MCF7 and MDA-MB-231 cells. The concentrations used for the assay were 1nM, 5nM, 10nM, 50nM, 100nM, 500nM, 1μM, 5μM and 10μM respectively. The AUC calculations were performed in GraphPadPrism9 b) The bar plot depicting the AUC calculated for top three compounds for all the concentrations mentioned above c) AUC comparison for SM216 treated normal cells (HMEC and HPDE) and cancer cells (MCF7) d) AUC plots based on five concentrations (100nM, 500nM, 1μM, 5μM and 10μM) of compounds both for normal and cancer cells.

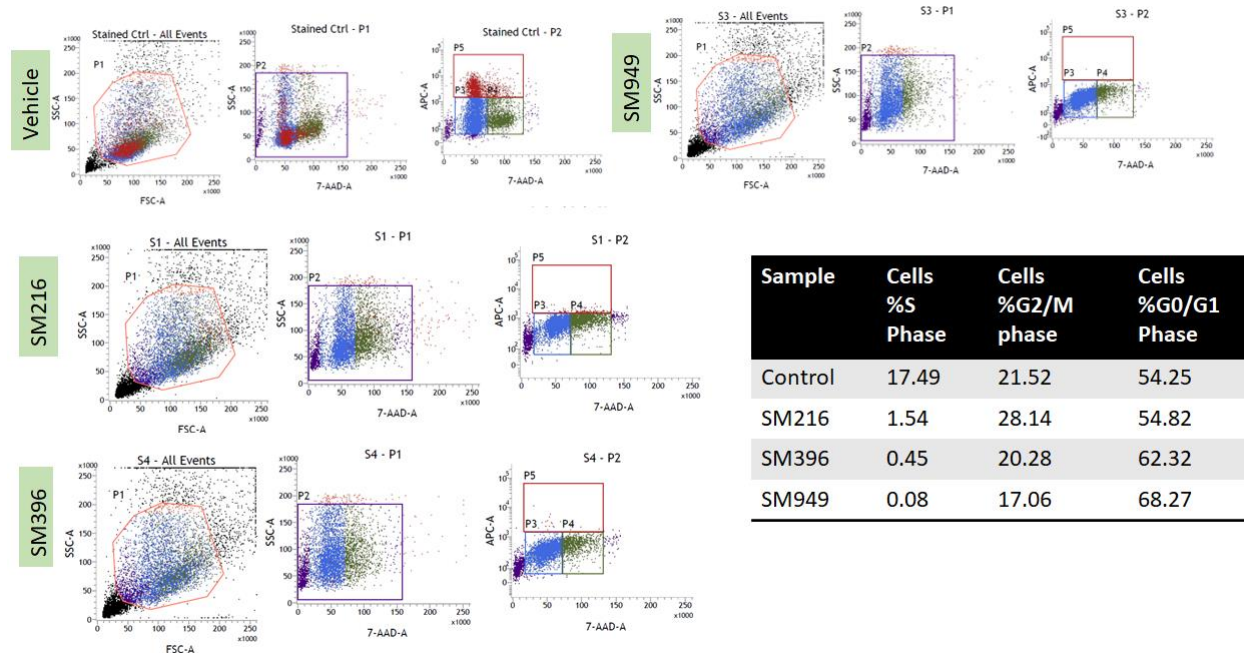

**Supplementary Figure S6:** Flow plots of the control, SM216, SM396 and SM949 treated MDA-MB-231 cells of BrDU assay. The percentages of S, G2/M and G0/G1 phase cell populations were presented as table.

**Supplementary Table S1:** Quantification of Caspase 3 IHC staining in animal tissue samples

| S.NO | SLIDE DESCRIPTION | PERCENTAGE POSITIVE CELLS (P) | INTENSITY OF STAINING (I) | Q SCORE (Q = P*I) | MEAN Q SCORE |
|------|-------------------|-------------------------------|---------------------------|-------------------|--------------|
| 1    | VEHICLE           | 10                            | 1+                        | 10                | 10           |
| 2    | VEHICLE           | 10                            | 1+                        | 10                |              |
| 3    | VEHICLE           | 10                            | 1+                        | 10                |              |
| 4    | SM 396            | 70                            | 3+                        | 210               | 220          |
| 5    | SM 396            | 80                            | 3+                        | 240               |              |
| 6    | SM 396            | 70                            | 3+                        | 210               |              |
| 7    | ABT 199           | 90                            | 3+                        | 270               | 250          |
| 8    | ABT 199           | 80                            | 3+                        | 240               |              |
| 9    | ABT 199           | 80                            | 3+                        | 240               |              |
